# Supplementary material for: Noninvasive Stereotactic Radiotherapy for PADN in an Acute Canine Model of Pulmonary Arterial Hypertension
Source: PubMed Central journal article supplement — JACC Basic Transl Sci. 2023 Dec 6;9(2):244–56. doi: 10.1016/j.jacbts.2023.09.013 (PMC10950402; doi:10.1016/j.jacbts.2023.09.013), 2023-12-06
Supplement: mmc1.pdf [file mmc1.pdf]

## Supplemental Appendix

**Supplemental Table 1. Radiotherapy parameters.**

|                                                           | <b>DOG-1</b>            | <b>DOG-2</b>           | <b>DOG-3</b>            | <b>DOG-4</b>           | <b>DOG-5</b>            | <b>DOG-6</b>           | <b>DOG-7</b>            | <b>DOG-8</b>            |
|-----------------------------------------------------------|-------------------------|------------------------|-------------------------|------------------------|-------------------------|------------------------|-------------------------|-------------------------|
| <b>Prescription dose(Gy)</b>                              | 45                      | 45                     | 45                      | 45                     | 45                      | 45                     | 45                      | 45                      |
| <b>Collimator size(mm)</b>                                | 15                      | 15                     | 20                      | 20                     | 20                      | 15                     | 20                      | 15                      |
| <b>volume (cm<sup>3</sup>)</b>                            | 12.6                    | 9.09                   | 19.37                   | 14.12                  | 14.50                   | 10.04                  | 14.35                   | 13.54                   |
| <b>Beams</b>                                              | 127                     | 112                    | 138                     | 106                    | 130                     | 124                    | 110                     | 136                     |
| <b>Monitor unit (MU)</b>                                  | 26968                   | 27997                  | 24203                   | 25019                  | 21398                   | 23864                  | 20269                   | 28261                   |
| <b>Treatment time (min)</b>                               | 92                      | 95                     | 84                      | 87                     | 74                      | 82                     | 72                      | 96                      |
| <b>Mean delivered dose to nearby tissues (range) (Gy)</b> |                         |                        |                         |                        |                         |                        |                         |                         |
| <b>Lung</b>                                               | 6.8±6.1<br>(0.4-55.3)   | 6.2±6.1<br>(0.3-48.0)  | 5.8±5.7<br>(0.4-44.4)   | 6.8±6.2<br>(0.5-46.0)  | 5.6±5.4<br>(0.5-44.0)   | 4.6±4.4<br>(0.2-46.9)  | 4.2±3.9<br>(0.4-45.7)   | 8.1±6.5<br>(0.4-44.3)   |
| <b>Spinal cord</b>                                        | 3.5±1.7<br>(0.7-7.0)    | 4.1±1.8<br>(0.8-7.8)   | 2.9±0.6<br>(1.7-4.1)    | 6.8±1.9<br>(3.6-11.8)  | 3.1±1.5<br>(1.0-7.9)    | 3.9±2.1<br>(0.8-27.9)  | 2.4±0.8<br>(1.5-5.4)    | 4.3±2.2<br>(1.1-8.9)    |
| <b>Heart</b>                                              | 15.7±10.7<br>(0.5-47.1) | 9.8±8.7<br>(0.6-50.4)  | 10.8±9.5<br>(0.4-50.5)  | 10.7±8.9<br>(0.5-49.5) | 9.2±7.7<br>(0.6-50.5)   | 7.7±7.2<br>(0.6-46.4)  | 8.2±8.5<br>(0.4-49.8)   | 11.3±7.0<br>(0.9-44.8)  |
| <b>Esophagus</b>                                          | 16.1±6.2<br>(5.7-32.1)  | 9.2±7.9<br>(2.5-24.2)  | 10.6±6.5<br>(1.5-35.6)  | 17.2±5.1<br>(6.0-35.5) | 10.4±3.9<br>(3.0-26.2)  | 7.7±3.4<br>(2.9-23.0)  | 9.7±4.2<br>(3.1-26.5)   | 10.8±4.1<br>(3.0-28.7)  |
| <b>Trachea</b>                                            | 18.1±13.3<br>(0.7-49.6) | 22.5±8.6<br>(6.9-47.3) | 27.9±7.8<br>(10.2-46.4) | 20.1±9.5<br>(2.0-45.2) | 18.9±8.5<br>(3.6-46.1)  | 16.8±9.9<br>(1.3-45.3) | 19.5±10.6<br>(1.4-50.4) | 20.5±6.9<br>(4.5-41.6)  |
| <b>Bronchus</b>                                           | 26.2±7.9<br>(10.0-47.5) | 31.2±7.9<br>(9.3-49.8) | 26.8±8.5<br>(9.8-44.1)  | 24.1±7.5<br>(8.8-43.0) | 29.0±6.4<br>(16.1-46.0) | 20.6±8.5<br>(5.1-43.5) | 23.2±7.1<br>(8.4-45.0)  | 24.3±5.8<br>(12.7-41.1) |
